# Supplementary material for: Intervention for control of hypertension in Catalonia, Spain (INCOTECA Project): results of a multicentric, non-randomised, quasi-experimental controlled intervention study
Source: PubMed Central journal article supplement — BMJ Open. 2012 Apr 18;2(2):e000507. doi: 10.1136/bmjopen-2011-000507 (PMC3332244; doi:10.1136/bmjopen-2011-000507), 2012-04-18
Supplement: bmjopen-2011-000507.draft_revisions.pdf [file bmjopen-2011-000507.draft_revisions.pdf]

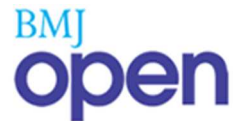

**Intervention for control of hypertension in Catalonia, Spain  
(INCOTECA Project): results of the multicentric non-  
randomised quasi-experimental controlled intervention  
study**

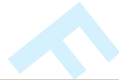

|                                 |                                                                                                                                                                                                                                                                                                                                                                                                                                                                                                                                                                                                                                                                                                                                                                                                                                                                                                                                                                                                                                                                                                                                                                     |
|---------------------------------|---------------------------------------------------------------------------------------------------------------------------------------------------------------------------------------------------------------------------------------------------------------------------------------------------------------------------------------------------------------------------------------------------------------------------------------------------------------------------------------------------------------------------------------------------------------------------------------------------------------------------------------------------------------------------------------------------------------------------------------------------------------------------------------------------------------------------------------------------------------------------------------------------------------------------------------------------------------------------------------------------------------------------------------------------------------------------------------------------------------------------------------------------------------------|
| Journal:                        | <i>BMJ Open</i>                                                                                                                                                                                                                                                                                                                                                                                                                                                                                                                                                                                                                                                                                                                                                                                                                                                                                                                                                                                                                                                                                                                                                     |
| Manuscript ID:                  | bmjopen-2011-000507                                                                                                                                                                                                                                                                                                                                                                                                                                                                                                                                                                                                                                                                                                                                                                                                                                                                                                                                                                                                                                                                                                                                                 |
| Article Type:                   | Research                                                                                                                                                                                                                                                                                                                                                                                                                                                                                                                                                                                                                                                                                                                                                                                                                                                                                                                                                                                                                                                                                                                                                            |
| Date Submitted by the Author:   | 14-Nov-2011                                                                                                                                                                                                                                                                                                                                                                                                                                                                                                                                                                                                                                                                                                                                                                                                                                                                                                                                                                                                                                                                                                                                                         |
| Complete List of Authors:       | Vallès-Fernández, Roser; Primary Care Service Cerdanyola-Ripollet. Catalan Institute of Health, Pharmacy<br>Rodriguez-Blanco, Teresa; IDIAP Jordi Gol Foundation IDIAP Jordi Gol Foundation, Department of Epidemiology and Biostatistics<br>Mengual-Martínez, Lucas; Primary Care Team Badia del vallès<br>Rosell-Murphy, Magdalena; IDIAP Jordi Gol Foundation IDIAP Jordi Gol Foundation, Department of Epidemiology and Biostatistics<br>Prieto-De Lamo, Gemma; IDIAP Jordi Gol Foundation IDIAP Jordi Gol Foundation, Department of Epidemiology and Biostatistics<br>Martínez-Frutos, Fina; Primary Care Team Canaletets-Fontetes<br>Mimoso-Moreno, Sonia; Primary Care Team Canaletets-Fontetes<br>Bellerino-Serrano, Eva; Primary Care Team Ripollet<br>Álvarez-Lázaro, Alícia; Primary Care Team Ripollet<br>Franzi-Sisó, Alícia; Primary Care Service Sabadell-Rubí-St. Cugat-Terrassa<br>Martínez-Vindel, Juan Carlos; Primary Care Team Barberà<br>Alonso-Ortega, M <sup>a</sup> Socorro; Primary Care Team Barberà<br>Olmedo-Muñoz, Imma; Primary Care Team Serraparera<br>Bonet-Simó, Josep M <sup>a</sup> ; Primary Care Service Cerdanyola-Ripollet |
| <b>Primary Subject Heading</b>: | General practice & Family practice                                                                                                                                                                                                                                                                                                                                                                                                                                                                                                                                                                                                                                                                                                                                                                                                                                                                                                                                                                                                                                                                                                                                  |
| Secondary Subject Heading:      | Public health, Qualitative research, Cardiovascular medicine                                                                                                                                                                                                                                                                                                                                                                                                                                                                                                                                                                                                                                                                                                                                                                                                                                                                                                                                                                                                                                                                                                        |
| Keywords:                       | Hypertension < CARDIOLOGY, Quality in health care < HEALTH SERVICES ADMINISTRATION & MANAGEMENT, PRIMARY CARE, PUBLIC HEALTH                                                                                                                                                                                                                                                                                                                                                                                                                                                                                                                                                                                                                                                                                                                                                                                                                                                                                                                                                                                                                                        |
|                                 |                                                                                                                                                                                                                                                                                                                                                                                                                                                                                                                                                                                                                                                                                                                                                                                                                                                                                                                                                                                                                                                                                                                                                                     |

SCHOLARONE™  
Manuscripts

**TITLE PAGE**

**Intervention for control of hypertension in Catalonia, Spain (INCOTECA Project):  
results of the multicentric non-randomised quasi-experimental controlled intervention  
study**

**Authors:** R Vallès-Fernández\*, T Rodriguez-Blanco, L Mengual-Martínez, M Rosell-Murphy, G Prieto-De Lamot, F Martínez-Frutos, S Mimoso-Moreno, E Bellerino-Serrano, A Àlvarez-Lázaro, A Franzi-Sisó, JC Martínez-Vindel, MS Alonso-Ortega, I Olmedo-Muñoz, JM Bonet-Simó, and the INCOTECA research group.

\*Corresponding author:

**Name:** Dr. Roser Vallès Fernández. Senior pharmacist

**Institution:** Primary Care Service (SAP) Cerdanyola-Ripollet. Catalan Institute of Health (ICS).

**Postal address:** CAP Fontetes. Pl. Velázquez s/n. 08291 Cerdanyola del Vallès (Barcelona).  
Spain

**e-mail:** [rvallesf@gencat.cat](mailto:rvallesf@gencat.cat)

**Phone** 93 594 21 90.

**Fax:** 93 580 60 77

Co-authors:

- Teresa Rodríguez- Blanco, statistician. **Institution:** Primary Care Research Institute (IDIAP Jordi Gol). **City:** Barcelona. **Country:** Spain.
- Lucas Mengual-Martínez, general practitioner. **Institution:** Primary Care Team (EAP) Badia del Vallès. Catalan Institute of Health (ICS). **City:** Badia del Vallès. **Country:** Spain.

- 1  
2  
3  
4  
5  
6  
7  
8  
9  
10  
11  
12  
13  
14  
15  
16  
17  
18  
19  
20  
21  
22  
23  
24  
25  
26  
27  
28  
29  
30  
31  
32  
33  
34  
35  
36  
37  
38  
39  
40  
41  
42  
43  
44  
45  
46  
47  
48  
49  
50  
51  
52  
53  
54  
55  
56  
57  
58  
59  
60
- Magdalena Rosell-Murphy, epidemiologist and general practitioner. **Institution:** Primary Care Research Institute (IDIAP Jordi Gol). **City:** Barcelona. **Country:** Spain.
  - Gemma Prieto-De Lamo, epidemiologist. **Institution:** Primary Care Research Institute (IDIAP Jordi Gol). **City:** Barcelona. **Country:** Spain.
  - Fina Martínez-Frutos, general practitioner. **Institution:** Primary Care Team (EAP) Canaletes-Fontetes. Catalan Institute of Health (ICS). **City:** Cerdanyola del Vallès. **Country:** Spain.
  - Sonia Mimoso-Moreno, nurse practitioner. **Institution:** Primary Care Team (EAP) Canaletes-Fontetes. Catalan Institute of Health (ICS). **City:** Cerdanyola del Vallès. **Country:** Spain.
  - Eva Bellerino-Serrano, general practitioner. **Institution:** Primary Care Team (EAP) Ripollet. Catalan Institute of Health (ICS). **City:** Ripollet. **Country:** Spain.
  - Alícia Àlvarez-Lázaro, nurse practitioner. **Institution:** Primary Care Team (EAP) Ripollet. Catalan Institute of Health (ICS). **City:** Ripollet. **Country:** Spain.
  - Alícia Franzi-Sisó, senior pharmacist. **Institution:** Primary Care Service (SAP) Sabadell-Rubí-St. Cugat-Terrassa. Catalan Institute of Health (ICS). **City:** Sabadell. **Country:** Spain.
  - Juan Carlos Martínez-Vindel, general practitioner. **Institution:** Primary Care Team (EAP) Barberà. Catalan Institute of Health (ICS). **City:** Barberà del Vallès. **Country:** Spain.
  - M<sup>a</sup> Socorro Alonso-Ortega, nurse practitioner. **Institution:** Primary Care Team (EAP) Barberà. Catalan Institute of Health (ICS). **City:** Barberà del Vallès. **Country:** Spain.
  - Imma Olmedo-Muñoz, general practitioner. **Institution:** Primary Care Team (EAP) Serraparera. Catalan Institute of Health (ICS). **City:** Cerdanyola del Vallès. **Country:** Spain.

- 1  
2 - Josep M<sup>a</sup> Bonet-Simó, general practitioner. **Institution:** Primary Care Service (SAP)  
3  
4 Cerdanyola-Ripollet. Catalan Institute of Health (ICS). **City:** Cerdanyola del Vallès.  
5  
6 **Country:** Spain.  
7  
8  
9

10 **Key words:** quality improvement, blood pressure, hypertension, community health.  
11

12 **Word count:** 4.098  
13  
14  
15  
16  
17  
18  
19  
20  
21  
22  
23  
24  
25  
26  
27  
28  
29  
30  
31  
32  
33  
34  
35  
36  
37  
38  
39  
40  
41  
42  
43  
44  
45  
46  
47  
48  
49  
50  
51  
52  
53  
54  
55  
56  
57  
58  
59  
60

**ABSTRACT**

**Objective:** The purpose of this study was to assess the effectiveness of a Quality Improvement plan aimed at Primary Health Care Teams to optimise hypertension control and to compare it with standard clinical care.

**Methods:** *Design:* Multicentric non-randomised quasi-experimental controlled intervention study. *Setting:* Five Primary Health Care Teams in the intervention and 13 in the control group in the province of Barcelona, Catalonia, Spain. *Participants:* This is a population-based study in which all patients over 18 years of age with a diagnosis of hypertension before 1 January 2006 were included (n=9,877 in the intervention group and n=21,704 in the control group). *Intervention:* A quality improvement plan that targeted primary care professionals. The plan included training sessions, feedback to health professionals, audit and implementation of recommended clinical practice guidelines for the management of hypertensive patients. *Main outcome measure:* Prevalence of hypertensive patients with an adequate blood pressure control.

**Results** The adjusted difference between intervention and standard care groups in the odds of blood pressure control was 1.3 (95% confidence interval: 1.1 to 1.6; P=0.003). Results of the mixed model on repeated measures showed that, on average, an individual in the intervention group had an increase of 92% in the odds of blood pressure control (odds ratio: 1.9, 95% confidence interval: 1.7 to 2.1).

**Conclusions** The implementation of a Quality Improvement plan can improve blood pressure control. This strategy is potentially feasible for up-scaling within the existing primary health care teams.

**Trial registration:** ClinicalTrials.gov MS: 1998275938244441

## ARTICLE SUMMARY

### Article focus

- To assess the effectiveness of a QI programme targeting health professionals to optimise BP control in hypertensive patients. Other factors associated with BP control were analysed.

### Key messages

- The QI plan aimed at PHCTs (doctors, nurses and administrative staff) implemented in our study has proven effective to improve hypertension control.
- A history of a cardiovascular event has a positive effect in BP control.
- The addition of different antihypertensive drugs to the management of hypertensive patients without considering other aggravating factors does not guarantee a better BP control.

### Strengths and limitations of study

- The population-based design and mixed-effects modelling on repeated measures were the main strengths of this study.
- The mixed models approach is a powerful method for analysing data from longitudinal studies which include multiple measurements on each participant
- The most of the intervention in this study has been implemented with few additional resources.
- The duration of the study can be considered the main limitation of this investigation. Longer-term studies that include unmeasured factors are needed to determine the effectiveness and cost-effectiveness of this measure and the impact of a reduction in BP values on cardiovascular morbi-mortality in the hypertensive population.

1  
2  
3  
4  
5  
6  
7  
8  
9  
10  
11  
12  
13  
14  
15  
16  
17  
18  
19  
20  
21  
22  
23  
24  
25  
26  
27  
28  
29  
30  
31  
32  
33  
34  
35  
36  
37  
38  
39  
40  
41  
42  
43  
44  
45  
46  
47  
48  
49  
50  
51  
52  
53  
54  
55  
56  
57  
58  
59  
60

For peer review only

## **BACKGROUND**

High blood pressure (BP) figures amongst the most common and important health problems in developed countries. Hypertension is an established risk factor for cardiovascular disease, stroke, kidney disease, all cause mortality and shortened life expectancy.<sup>1;2</sup>

The prevalence of hypertension in Spain ranges from 20% to 47% in the population older than 20 years and up to 65% in the population above 60 years of age.<sup>3</sup> It is one of the main reasons for seeking medical attention in primary care, particularly in the elderly population.<sup>3</sup>

One in two cardiovascular deaths in Spanish individuals over 50 is attributable to high blood pressure.<sup>4</sup> A number of studies carried out in Europe and in the United States have shown that BP control in hypertensive patients is suboptimal.<sup>3;5-7</sup>

The Catalan Health Department Health Plan for the 2007-2010 period states that the health systems have to put in place strategies to achieve a 50% control of the hypertensive population.<sup>8</sup>

Inadequate hypertension control has been associated with various factors such as therapeutic compliance, diabetes, age, lifestyle, concomitant treatments, the technique and the equipment to measure BP, etc.<sup>3;6;7;9</sup> Management by primary health care teams (PHCTs) is one of the factors that can influence control of hypertensive patients.<sup>5;10-12</sup> Quality improvement (QI) strategies can target health professionals, patients or both and many QI strategies have focused on improving hypertension control. These interventions can be classified as provider education (materials and instructions given to providers regarding appropriate care for patients), provider reminders (prompts given to providers to perform specific care tasks), provider audit and feedback, patient education, patient reminders, promotion of self-management, team management changes (creation of multidisciplinary teams, addition of new team members, change of roles, case or disease management) and financial regulation and incentives or reimbursement changes.<sup>12</sup>



1  
2  
3  
4  
5  
6  
7  
8  
9  
10  
11  
12  
13  
14  
15  
16  
17  
18  
19  
20  
21  
22  
23  
24  
25  
26  
27  
28  
29  
30  
31  
32  
33  
34  
35  
36  
37  
38  
39  
40  
41  
42  
43  
44  
45  
46  
47  
48  
49  
50  
51  
52  
53  
54  
55  
56  
57  
58  
59  
60

Previous studies have shown the positive impact of multifaceted QI interventions on BP control. However, few of these studies have been analysed using the appropriate methodology or have been designed as population based. We believe therefore that the evaluation of the effectiveness of a programme to improve health care quality targeting primary health care professionals with the aim to optimise BP control in the whole hypertensive population is warranted.<sup>5;10-12</sup>

We had hypothesized that a plan for QI at primary health care level addressed to primary health care professionals would improve the management and control of hypertensive patients. Our primary aim was to assess the effectiveness of a QI programme targeting health professionals to optimise BP control in hypertensive patients. Other factors associated with BP control were analysed.

## **METHODS**

The study protocol received institutional review board approval (IDIAP Jordi Gol Ethical Clinical Committee) and it conforms to the principles embodied in the Declaration of Helsinki. The detailed methods and the study protocol have been described elsewhere.<sup>13</sup>

### **Recruitment and assignment**

The study took place from January 2006 to April 2008. All hypertensive patients diagnosed and registered in the electronic clinical records (ECRs) of 18 PHCTs (405,232 inhabitants) in the Barcelona province (Catalonia, Spain) were included in this population-based study. All the Catalan Institute of Health PHCTs invited to take part in this study accepted.

Inclusion criteria: patients eligible to be enrolled in the study were over 18 years of age and with a hypertension diagnosis before 1 January 2006. A diagnosis of hypertension was considered when the doctor had entered in the patient's clinical record the relevant ICD-10 code (code: I10), following the recommendations of the European Hypertension Guidelines.<sup>14</sup>

Exclusion criteria: we excluded patients without electronic clinical measurements in the year previous to the study.

1 The non-random allocation to the control or intervention groups was decided on the basis of  
2 the administrative area. Each PHCTs administrative area has its own training and tasks  
3 strategies. The study design was therefore not randomised by PHCT to reduce the possibility  
4 of contamination between the PHCTs of the same administrative area.  
5  
6  
7  
8  
9

10 The intervention group consisted of 5 PHCTs in the Cerdanyola-Ripollet area with a  
11 catchment population of 135,505 at the onset of the study. The standard care group (control  
12 group) consisted of 13 PHCTs in the Sabadell area with a catchment population of 269,727  
13 inhabitants. Both primary health care areas are comparable in terms of population  
14 characteristics and socio-economic level. The study was fully explained to health  
15 professionals in both the standard and intervention groups and verbal consent to participate  
16 was obtained.  
17  
18  
19  
20  
21  
22  
23  
24

### 25 **Quality-Improvement intervention**

26 The study intervention consisted in the implementation of a QI plan targeted at all health  
27 professionals (approximately 430 between physicians, nurses and administrative staff)  
28 working in PHCTs in the Cerdanyola-Ripollet administrative area. In the Sabadell  
29 administrative area, the number of professionals was approximately 600. Briefly, the QI plan  
30 was divided in four phases:  
31  
32  
33  
34  
35  
36  
37  
38

- 39 1) Pre-intervention: non-validated BP monitors were removed from the PHCTs  
40 examination rooms and replaced by the digital OMRON M6 BP monitor.<sup>15</sup> The blood  
41 pressure measurement technique was standardized in both groups following the  
42 Clinical Practice Guidelines recommendations.<sup>14;16</sup>  
43  
44  
45  
46  
47

48 The software used to store computerised clinical records was modified for health  
49 professionals to be able to enter specific data related to hypertensive patients  
50 following the Catalan Institute of Health guidelines on hypertension.<sup>16</sup>  
51  
52

- 53 2) Second phase (intervention group): a programme was designed to train PHCTs'  
54 doctors and nurses. Posters and leaflets with specific educational contents were made  
55  
56  
57  
58  
59  
60

1 available to participants. A total of 8 workshops at each of the participating PHCTs  
2  
3  
4 took place in three stages (mean attendance rate at workshops was 65% with 6,59  
5  
6 mean assessment points over ten points range):  
7

8 -Year 2006: three sessions to introduce the QI plan, revise the criteria for  
9 diagnosis of hypertension, BP measurement method and criteria for entering data  
10 in the computerised clinical record.  
11  
12

13 -Year 2006-2007: three sessions to discuss issues such as the implementation of  
14 the QI plan, hypertension treatment and approach to poor compliance.  
15  
16

17 -Year 2008: two sessions to present the interim results of the QI plan and the  
18 comprehensive management of hypertensive patients.  
19  
20

- 21  
22  
23  
24 3) Third phase (intervention group): from April 2007 to April 2008 the interventions  
25 focused on the identification of patients with uncontrolled hypertension and the  
26 improvement of their management. The applied measures were: six-monthly feedback  
27 to professionals; audits to evaluate the implementation of the QI plan; and a reference  
28 team (a doctor and a nurse) assigned to every PHCT.  
29  
30  
31  
32

- 33  
34  
35 4) Fourth phase: evaluation of the effectiveness of a QI plan  
36

37 Professionals allocated to the standard care group followed the standard clinical management  
38 based on the Catalan Institute of Health hypertension guidelines.<sup>16</sup>  
39

#### 40 41 **Masking**

42 The study was not blinded at PHCT or patient level because of the nature of the intervention.  
43

44 The analyst was unaware of the group allocation.  
45  
46

#### 47 48 **Data collection**

49 Primary care professionals enter the results and activities of their work in the e-CAP database  
50 regularly. The data collection procedure involved the reading of this computerised clinical  
51 records database approximately every 4 months from April 2007 to April 2008.  
52  
53  
54  
55

#### 56 57 **Outcomes and other variables**

58  
59  
60

1 Control of hypertension based on the average SBP and DBP reading records over the last 12  
2 months was considered a dichotomous outcome variable (yes/no). The median number of BP  
3 readings was three (interquartile range: two to five). SBP and DBP were evaluated as  
4 dependent continuous variables.  
5  
6  
7  
8  
9

10 BP control was defined as SBP < 140 mmHg and DBP < 90 mmHg. In patients with  
11 diabetes, heart or renal failure, control values were defined as SBP < 130 mmHg and DBP <  
12 85 mmHg. Other variables considered were: age (continuous); sex ( male/female); number of  
13 antihypertensive drugs as categorical ( 0 / 1/ 2 / 3 or more drugs); comorbidities as presence  
14 of diabetes mellitus type I or II, heart failure or renal failure (yes /no); cardiovascular events  
15 as presence of acute myocardial infarction, angina or stroke (yes/no).  
16  
17  
18  
19  
20  
21  
22

### 23 **Analysis**

24 Data were reported according to the standard published by the TREND group.<sup>17</sup> Descriptive  
25 statistics were used to describe the study population.  
26  
27  
28

29 Differences between groups at baseline and at follow-up times were assessed by comparing  
30 means, medians or percentages, depending on the type of variable.  
31  
32

33 The analysis was performed at individual level using methods for clustered data (grouping  
34 factor: PHCT)<sup>18</sup> and based on the intention-to-treat principle.  
35  
36  
37

38 The following time points were considered for data collection: baseline, four, nine and 12  
39 months. Patients were included in the analysis if data were available for at least one follow-up  
40 time point in addition to the baseline data. To address potential biases due to incomplete  
41 follow-up data, we imputed missing values using the last known value carried forward.  
42  
43  
44  
45  
46  
47

48 The intervention effect was assessed through observed change and standardised effect-size  
49 (SES).<sup>19-21</sup> For between-group comparisons, SES were calculated following Kazis' et al  
50 method.<sup>20</sup>  
51  
52  
53

54 For within-group comparisons the longitudinal form of SES, also known as the standardised  
55 response mean (SRM), was used.<sup>19;20;22</sup> Cohen's rule of thumb for interpreting the effect size  
56  
57  
58  
59  
60

1 index, a value of 0.2 as small, 0.5 as moderate, and 0.8 or greater as large, can be applied to  
2  
3 the SRM.<sup>19</sup>  
4

5  
6 Linear and logistic mixed-effects models with PHCT as random effect were used to allow for  
7  
8 within-PHCT correlation to assess the effect of the intervention at 1-year follow-up, adjusted  
9  
10 for baseline measurement and for differences between groups in the individual variables. The  
11  
12 odds ratio (OR) for the logistic model was estimated as the exponential function of the  
13  
14 regression coefficient,  $\exp(\text{coefficient})$ .  
15  
16

17 The individual variables considered were age, sex, number of antihypertensive drugs,  
18  
19 comorbidity and cardiovascular event.  
20

21 We examined the effects of intervention over all time points using mixed-effects models on  
22  
23 repeated measures.<sup>23;24</sup> Level-1 covariates varied by measurement occasion and included time  
24  
25 (age-centred at 1-year follow-up), number of antihypertensive drugs, comorbidity and  
26  
27 cardiovascular event. Level-2 covariates varied by subject and included sex and group.  
28  
29 Interactions between time and group effect were assessed.  
30  
31

32 All models have been compared by the partial likelihood ratio test and Akaike's information  
33  
34 criterion (AIC). All results are shown with their 95% confidence intervals (CI). Statistical  
35  
36 significance was set at  $P < 0.01$  (two-tailed).  
37  
38

39 Stata SE 11.0 (StataCorp LP, College Station, Texas), and SAS statistical software version 9.1  
40  
41 (SAS Institute Inc, Cary, North Carolina) were used for all analyses.  
42  
43

## 44 **RESULTS**

45  
46 A total of 51,642 people were included in the study, 16,422 (5 PHCTs) were allocated to the  
47  
48 intervention and 35,220 (13 PHCTs) to the standard care group. The exclusion rate was  
49  
50 33.5% (17,315 patients). Follow-up data were available for 92% of the patients. The final  
51  
52 analysis included 31,581 patients, 9,877 (5 PHCTs) in the intervention arm and 21,704 (18  
53  
54 PHCTs) in the standard care arm (Figure 1).  
55  
56  
57  
58  
59  
60

The mean age of the standard care group was slightly higher and presented a higher proportion of cardiovascular events than the patients in the intervention group. Otherwise the groups were clinically comparable (Table 1).

**Table 1: Patient characteristics.**

|                                            | Total             | Standard care group  | Intervention group   | P-value |
|--------------------------------------------|-------------------|----------------------|----------------------|---------|
| No PHCTs                                   | 18                | 13                   | 5                    |         |
| No of patients                             | 31581             | 21704                | 9877                 |         |
| <b>Demographic/clinical variables</b>      |                   |                      |                      |         |
| Age, years (mean [SD])                     | 68.6 (11.6)       | 69.1 (11.5)          | 67.6 (11.6)          | <0.001  |
| Sex, female                                | 18825 (59.6)      | 12914 (59.5)         | 5911 (58.8)          | 0.562   |
| No of BP drugs, (mean [SD]; median [IQR])  | 1.4 [0.8]; 1(1-2) | 1.4 [0.9]; 1(1 to 2) | 1.5 [0.9]; 1(1 to 2) | 0.028** |
| Patients with antihypertensive drugs n (%) |                   |                      |                      |         |
| 0                                          | 3315 (10.5)       | 2319 (10.7)          | 996 (10.1)           | 0.031   |
| 1                                          | 15209 (48.1)      | 10501 (48.4)         | 4708 (47.7)          |         |
| 2                                          | 9068 (28.7)       | 6212 (28.6)          | 2856 (28.9)          |         |
| 3 or more                                  | 3989 (12.6)       | 2672 (12.3)          | 1317 (13.3)          |         |
| Comorbidity <sup>#</sup>                   | 9490 (30.0)       | 6584 (30.3)          | 2906 (29.4)          | 0.101   |
| Diabetes mellitus                          | 8309 (26.3)       | 5720 (26.3)          | 2589 (26.2)          | 0.79    |
| Renal failure                              | 1022 (3.2)        | 721 (3.3)            | 301 (3.1)            | 0.201   |
| Heart failure                              | 862 (2.7)         | 648 (2.9)            | 214 (2.2)            | <0.001  |
| CV event <sup>&amp;</sup>                  | 3839 (12.2)       | 2928 (13.5)          | 911 (9.2)            | <0.001  |
| <b>Outcome characteristics<sup>§</sup></b> |                   |                      |                      |         |
| BP control                                 | 14195 (44.9)      | 9854 (45.4)          | 4341 (43.9)          | 0.016   |
| SBP, mmHg (mean [SD])                      | 138.3 (13.6)      | 138.1 (13.6)         | 138.7 (13.7)         | <0.001  |
| DBP, mmHg (mean [SD])                      | 79.5 (8.5)        | 79.4 (8.3)           | 79.5 (8.9)           | 0.231   |

Abbreviations: PHCTs=Primary Health Care Teams; BP= blood pressure; CV= cardiovascular; SBP= systolic blood pressure; DBP= diastolic blood pressure; IQR=interquartile range

\* P-values were calculated from a Student's t-test, the chi-square test or medians' test as appropriate, by comparing the different intervention groups

\*\* P-value for median comparison

<sup>#</sup> Comorbidity: presence of diabetes mellitus type I or II, heart failure or renal failure;

<sup>§</sup> Blood pressure was calculated from the mean of 3.5 (SD: 2.2) (median (IQR: 3[2, 5])) blood pressure readings obtained during one year

<sup>&</sup> CV =cardiovascular events: patient's clinical history of ICD-10 codes of acute myocardial infarction, angina or stroke

Hypertension was defined as SBP  $\geq$  140 mmHg and DBP  $\geq$  90 mmHg of clinical blood pressure measurements. In patients with diabetes, heart or renal failure (code ICD-10: E10 –E11- N17 – N18- N19- I50), hypertension were defined as SBP  $\geq$  130 mmHg and DBP  $\geq$  85 mmHg.

BP control was defined as SBP < 140 mmHg and DBP < 90 mmHg. In patients with diabetes, heart or renal failure, control values were defined as SBP < 130 mmHg and DBP < 85 mmHg.

A faster increase in the percentage of BP control was observed in the intervention group during the follow-up period. In the intervention group BP was 1.3 times more likely to be controlled than in the standard care group (adjusted OR: 1.3, 95% CI 1.1 to 1.6; P=0.003) (Table 2).

**Table 2: Changes in BP control, SBP and DBP within and between intervention and standard care group with missing data replaced using last value carried forward.**

|                   | Standard care group (n=21704) |                      |                  | Intervention group (n=9877) |                      |                  | Difference (95% CI) between groups (intervention group–control group) |         |                  |                               |         |
|-------------------|-------------------------------|----------------------|------------------|-----------------------------|----------------------|------------------|-----------------------------------------------------------------------|---------|------------------|-------------------------------|---------|
|                   | n (%) or mean (SD)            | Difference* (95% CI) | SRM <sup>#</sup> | n (%) or mean (SD)          | Difference* (95% CI) | SRM <sup>#</sup> | Unadjusted difference                                                 | P-value | SES <sup>§</sup> | Adjusted difference**         | P-value |
| <b>BP control</b> |                               |                      |                  |                             |                      |                  |                                                                       |         |                  |                               |         |
| baseline          | 9854 (45.4)                   |                      |                  | 4341 (43.9)                 |                      |                  |                                                                       |         |                  |                               |         |
| four months       | 9657 (44.5)                   | -0.9 (-1.5 to -0.3)  |                  | 4547 (46.0)                 | 2.1 (1.2 to 2.9)     |                  | 1.5 (0.4 to 2.7)                                                      | 0.011   |                  |                               |         |
| nine months       | 9469 (43.6)                   | -1.8 (-2.4 to -1.2)  |                  | 4614 (46.7)                 | 2.8 (1.9 to 3.6)     |                  | 3.1 (1.9 to 4.3)                                                      | <0.001  |                  |                               |         |
| 1-year            | 9457 (43.6)                   | -1.8 (-2.5 to -1.1)  |                  | 4880 (49.4)                 | 5.5 (4.4 to 6.5)     |                  | 5.8 (4.6 to 7.0)                                                      | <0.001  |                  | 1.3 (1.1 to 1.6) <sup>£</sup> | 0.003   |
| <b>SBP (mmHg)</b> |                               |                      |                  |                             |                      |                  |                                                                       |         |                  |                               |         |
| baseline          | 138.1 (13.6)                  |                      |                  | 138.7 (13.7)                |                      |                  |                                                                       |         |                  |                               |         |
| four months       | 138.3 (13.6)                  | 0.3 (0.1 to 0.4)     | -0.03            | 138.3 (13.7)                | -0.4 (-0.5 to -0.2)  | 0.04             | 0.0 (-0.3 to 0.3)                                                     | 0.95    | 0.00             |                               |         |
| nine months       | 138.5 (13.1)                  | 0.4 (0.3 to 0.5)     | -0.04            | 137.9 (13.1)                | -0.8 (-1.0 to -0.6)  | 0.09             | -0.6 (-0.9 to -0.3)                                                   | <0.001  | 0.05             |                               |         |
| 1-year            | 138.6 (13.8)                  | 0.5 (0.3 to 0.7)     | -0.04            | 136.7 (13.3)                | -2.0 (-2.3 to -1.8)  | 0.16             | -1.9 (-2.2 to -1.6)                                                   | <0.001  | 0.14             | -2.1 (-3.3 to -0.8)           | 0.001   |
| <b>DBP (mmHg)</b> |                               |                      |                  |                             |                      |                  |                                                                       |         |                  |                               |         |
| baseline          | 79.4 (8.3)                    |                      |                  | 79.5 (8.9)                  |                      |                  |                                                                       |         |                  |                               |         |
| four months       | 78.9 (8.3)                    | -0.4 (-0.5 to -0.4)  | 0.07             | 78.7 (9.0)                  | -0.8 (-0.9 to -0.7)  | 0.14             | -0.2 (-0.4 to -0.0)                                                   | 0.023   | 0.03             |                               |         |
| nine months       | 78.0 (8.1)                    | -0.4 (-0.5 to -0.3)  | 0.07             | 78.6 (8.7)                  | -0.9 (-1.0 to -0.8)  | 0.15             | -0.4 (-0.6 to -0.2)                                                   | <0.001  | 0.05             |                               |         |
| 1-year            | 78.6 (8.5)                    | -0.7 (-0.8 to -0.6)  | 0.09             | 77.9 (9.0)                  | -1.6 (-1.7 to -1.4)  | 0.21             | -0.7 (-0.9 to -0.5)                                                   | <0.001  | 0.08             | -0.9 (-1.3 to -0.5)           | <0.001  |

Abbreviations: PHCT=Primary Health Care Team; BP= blood pressure; CV= cardiovascular; SBP= systolic blood pressure; DBP= diastolic blood pressure; SD= standard deviation; CI= confidence interval

\*Mean differences are shown for quantitative outcomes and percentage differences for dichotomous outcomes. Differences were calculated between follow-up measurements and baseline measurements.

<sup>#</sup> SRM: Standardized response mean was calculated as the mean change by the standard deviation of the change

<sup>§</sup> SES: Standardised effect size was calculated as the mean difference between intervention and control groups divided by the standard deviation of the control measurement.

A positive SRM or SES denotes improvement; a negative one denotes worsening of some clinical measurements

\*\*Estimated with a mixed-effects model considering PHCT as random effect. Mean differences are shown for quantitative outcomes and odds ratios for dichotomous outcomes.

Adjusted for age at baseline; sex; number of antihypertensive drugs; comorbidity; cardiovascular event and baseline measurement.

<sup>£</sup> Value is odds ratio (95%CI)

1 The mean differences and SRM for within-groups comparisons of SBP and DBP were larger  
2 in the intervention group than in the standard care group. A larger mean difference and SRM  
3 were detected in SBP and DBP at 1 year follow-up, with slightly higher values for DBP.  
4 According to the Cohen's guidelines,<sup>19</sup> only this change in DBP can be considered a relevant  
5 change, though it represents a small effect size (SRM=0.21).  
6

7 The larger significant differences between intervention and standard care group were found at  
8 1 year follow-up in favour of the intervention for SBP and DBP. However, the SES did not  
9 reach a small effect.  
10

11 In the repeated measures analysis, the proportion of patients who maintained BP control  
12 during follow-up was 38.4% (95% CI 38.1 to 38.7) (intervention group: 40%, 95% CI 39.4 to  
13 40.5; standard care group: 37.7% , 95% CI 37.3 to 38.1) and the proportion of patients that  
14 improved over time (to pass to BP control) was 6.6% (95% CI 6.4 to 6.7) (intervention group:  
15 7.4% , 95% CI 7.1 to 7.7; standard care group: 6.2%, 95% CI 6 to 6.4). The difference in  
16 percentage in patients who maintained BP control between intervention and standard care  
17 group was 2.3% (95% CI 1.6 to 2.3) and the difference in those who improved was 1.2%  
18 (95% CI 0.8 to 1.5). The global trend showed a highly significant change in BP control over  
19 time (P<0.001).  
20

21 In the multilevel analysis we found that after 1 year follow-up an individual in the  
22 intervention group was expected on average to have an increase of 92% (OR: exp [0.65] =1.9,  
23 95% CI 1.7 to 2.1) in the odds of BP control, a reduction of 1.77 mmHg on the SBP (95% CI  
24 -2.10 to -1.45) and of 0.78 mmHg in DBP (95% CI -0.98 to -0.57). The effect of time showed  
25 that a patient in the intervention group experienced an increase in BP control together with a  
26 reduction in SBP and DBP over time. (Table 3)  
27  
28  
29  
30  
31  
32  
33  
34  
35  
36  
37  
38  
39  
40  
41  
42  
43  
44  
45  
46  
47  
48  
49  
50  
51  
52  
53  
54  
55  
56  
57  
58  
59  
60



**Table 3. Effects of covariates on Blood Pressure control, Systolic and Diastolic Blood Pressure (N=31581). Mixed-effects models on repeated measures (phases 1-4).**

|                        |                                                     | Blood Pressure control # |      |         | Systolic Blood Pressure & |      |         | Diastolic Blood Pressure & |      |         |
|------------------------|-----------------------------------------------------|--------------------------|------|---------|---------------------------|------|---------|----------------------------|------|---------|
|                        |                                                     | Adjusted $\beta$         | SE   | P-value | Adjusted $\beta$          | SE   | P-value | Adjusted $\beta$           | SE   | P-value |
| <b>Fixed effects</b>   |                                                     |                          |      |         |                           |      |         |                            |      |         |
| Final status           | Intercept                                           | 0.54                     | 0.05 | <.0001  | 137.93                    | 0.14 | <.0001  | 80.01                      | 0.09 | <.0001  |
|                        | Group (ref. control)                                | 0.65                     | 0.06 | <.0001  | -1.77                     | 0.17 | <.0001  | -0.78                      | 0.10 | <.0001  |
|                        | Gender (ref. male )                                 | 0.14                     | 0.05 | 0.006   | -0.11                     | 0.14 | 0.434   | -0.60                      | 0.09 | <.0001  |
|                        | Number of antihypertensive drugs (ref. 1 drug)      |                          |      |         |                           |      |         |                            |      |         |
|                        | 0 drugs                                             | 0.16                     | 0.08 | 0.049   | -0.53                     | 0.18 | 0.004   | 0.01                       | 0.11 | 0.898   |
|                        | 2 drugs                                             | -0.44                    | 0.05 | <.0001  | 0.89                      | 0.12 | <.0001  | -0.31                      | 0.08 | <.0001  |
|                        | >=3 drugs                                           | -0.69                    | 0.07 | <.0001  | 1.49                      | 0.17 | <.0001  | -0.79                      | 0.10 | <.0001  |
|                        | Comorbidity (ref. No)                               | -3.92                    | 0.06 | <.0001  | 1.49                      | 0.13 | <.0001  | -1.42                      | 0.08 | <.0001  |
| Rate of change         | Cardiovascular event (ref. No)                      | 0.51                     | 0.06 | <.0001  | -1.05                     | 0.16 | <.0001  | -2.01                      | 0.10 | <.0001  |
|                        | Time                                                | -0.21                    | 0.04 | <.0001  | 0.93                      | 0.11 | <.0001  | -0.29                      | 0.07 | <.0001  |
|                        | Time*Group                                          | 0.80                     | 0.06 | <.0001  | -2.51                     | 0.15 | <.0001  | -0.78                      | 0.09 | <.0001  |
|                        | Time*Number of antihypertensive drugs (ref. 1 drug) |                          |      |         | -1.58                     |      |         | -1.07                      |      |         |
|                        | 0 drugs                                             | -0.12                    | 0.10 | 0.217   | 0.30                      | 0.24 | 0.206   | 0.31                       | 0.14 | 0.282   |
|                        | 2 drugs                                             | 0.26                     | 0.06 | <.0001  | -0.92                     | 0.16 | <.0001  | -0.52                      | 0.09 | <.0001  |
|                        | >=3 drugs                                           | 0.34                     | 0.09 | <.0001  | -2.09                     | 0.21 | <.0001  | -1.04                      | 0.12 | <.0001  |
|                        |                                                     |                          |      |         |                           |      |         |                            |      |         |
| <b>Random effects</b>  |                                                     | Variance                 | SE   |         | Variance                  | SE   |         | Variance                   | SE   |         |
| Level1                 | Within-person (Residual)                            |                          |      |         | 26.65                     | 0.15 | <.0001  | 9.65                       | 0.05 | <.0001  |
| Level2                 | In final status (intercept)                         | 12.64                    | 0.24 | <.0001  | 165.83                    | 1.48 | <.0001  | 67.20                      | 0.59 | <.0001  |
|                        | In rate of change (Time)                            |                          |      |         | 104.35                    | 1.26 | <.0001  | 36.14                      | 0.44 | <.0001  |
|                        | Covariance                                          |                          |      |         | 53.74                     | 1.06 | <.0001  | 20.30                      | 0.40 | <.0001  |
| <b>Goodness of fit</b> |                                                     |                          |      |         |                           |      |         |                            |      |         |
|                        | Deviance                                            | 115503                   |      |         | 906066.8                  |      |         | 780098.3                   |      |         |
|                        | AIC                                                 | 115531                   |      |         | 906100.8                  |      |         | 780132.3                   |      |         |
|                        | BIC                                                 | 115648                   |      |         | 906243.0                  |      |         | 780274.4                   |      |         |

Note: Time was patient's age centred at 1-year follow-up (Final status); ref.= Reference; SE= Standard Error;

AIC= Akaike's Bayesian Information Criterion; BIC= Bayesian Information Criterion

#: SAS Proc Nlmixed; & SAS Proc mixed, full ML

Another associated factor which increased the probability of BP control was a cardiovascular event, also significantly associated with a reduction in SBP and DBP. Furthermore, the presence of comorbidity was associated with lower DBP but with a worse BP control and higher SBP. The use of two or more antihypertensive drugs was associated with a significant decreased BP control and higher SBP, but lower DBP. In all three models, there was strong

1 evidence of variation in the outcomes between participants, as indicated by the random  
2 intercepts. (Table 3)  
3  
4  
5  
6  
7

## 8 **DISCUSSION**

### 9 **Principal findings of the study**

10 Our results show a significant improvement in the intervention compared with the standard  
11 care group consistent across all assessed outcomes. The different models used to analyse the  
12 data from our study indicate that the implementation of a QI plan is effective in increasing BP  
13 control and decreasing both SBP and DBP. The analysis adjusted by baseline data shows that  
14 patients in the intervention group had 30% more probability of an adequate BP control after 1  
15 year follow-up. In the intervention group, mean SBP and DBP values decreased 2.1 mmHg  
16 and 0.9 mmHg, respectively, compared with the patients from the standard care group.  
17  
18  
19  
20  
21  
22  
23  
24  
25  
26  
27

28 The patients in the intervention group had a higher probability of an adequate BP control  
29 (OR: 1.9), as shown by the repeated measures analysis. The percentage of patients that  
30 maintained a good BP control or that changed from poor to adequate BP control was larger in  
31 the intervention (2.3%) than in the standard care group (1.2%).  
32  
33  
34  
35  
36

### 37 **Comparison with other studies**

38 Various reviews and meta-analyses on the effectiveness of QI strategies to improve BP  
39 control have been published.<sup>5;10-12</sup> In general, QI interventions on BP control are considered  
40 effective, although the results are variable and difficult to compare. For instance, the change  
41 in SBP and DBP values in QI interventions that included monitoring and feedback for  
42 providers was 1.5/0.6 mmHg,<sup>12</sup> a result similar to the current study. There is a recently study  
43 too which evaluated the effectiveness of a continuing medical education program to train  
44 primary care providers in evidence-based guidelines for hypertension prevention and control.  
45  
46  
47  
48  
49  
50  
51  
52  
53

54 <sup>25</sup> The change in BP was 1,99 mmHg in SBP and 1,49 mmHg in DBP. This intervention was  
55 cost-effective strategy to address hypertension.<sup>26</sup> The study reported by Landon and  
56  
57  
58  
59  
60

1 colleagues was carried out in asthmatic and diabetic patients.<sup>27</sup> Despite the lack of differences  
2 amongst groups, in the hypertension subgroup the percentage of adequate control was similar  
3 to ours.  
4  
5  
6

7  
8 Effectiveness varies according to the study. BP control and reduction in SBP and DBP values  
9 are analysed in two studies in relation to the type of intervention carried out: either a  
10 qualitative intervention aimed at general practitioners very similar to our study or an  
11 educational intervention aimed at patients.<sup>28;29</sup> The results related to the general practitioners  
12 differed from the results of our investigation. Effectiveness was evaluated after two years and  
13 no improvement in BP control was observed. However, they obtained a more significant  
14 reduction in SBP and DBP values (5 and 4 mmHg, respectively). This could be explained by  
15 their very low levels of BP control (27.8%) at the onset of the study, their very high SBP and  
16 DBP means (153.3 mmHg and 92.9 mmHg, respectively), and the health infrastructure of a  
17 developing country (Pakistan). Therefore, even if SBP and DBP values improved  
18 significantly, BP control was below the target of the Blood Pressure control Clinical Practice  
19 Guidelines.<sup>28</sup>  
20  
21  
22  
23  
24  
25  
26  
27  
28  
29  
30  
31  
32  
33

34  
35 In the 6-month study, SBP reduction was 0.3 mmHg (95% CI -1.5 to 2.2; P=0.76).<sup>29</sup> The  
36 following reasons may account for this lack of effect: (1) the intervention was addressed only  
37 to physicians; (2) the analysis was based on the patients that had completed follow-up; (3) and  
38 the study population represented a relatively healthy cohort with high rates of BP control at  
39 baseline.  
40  
41  
42  
43  
44

45  
46 On the other hand, a study similar to ours published by Gomez and colleagues<sup>30</sup> with the aim  
47 to reduce cardiovascular risk in hypertensive patients showed that the differences between the  
48 intervention and control groups in SBP and DBP values were larger, -9.0 mmHg (95% CI -  
49 11.3 to -6.7) and -3.9 mmHg (95% CI -5.4 to -2.4), respectively. The greater reduction of BP  
50 values in this study compared to ours could be explained by the recruitment of only 849  
51 hypertensive patients with a long-term regular follow up in the PHCTs, instead of the whole  
52  
53  
54  
55  
56  
57  
58  
59  
60

1 hypertensive population included in our study. Such studies allow health professionals to  
2 focus on the follow-up of these patients to achieve better results, but lower patient numbers  
3 limit their external validity. The impact of a previous cardiovascular event on BP control in  
4 these studies is not known.<sup>27-30</sup>

5  
6  
7  
8  
9  
10 Despite the small impact of our intervention on SBP and DBP, we consider these results  
11 clinically relevant since several studies show that small reductions in SBP and DBP in the  
12 general population are associated with a decrease in the number of cardiovascular events: a  
13 10% reduction in stroke mortality and around 7% reduction in mortality due to cardiovascular  
14 disease in the middle-aged population have been associated to a 2 mmHg decrease in SBP.  
15  
16  
17  
18  
19  
20  
21  
22  
23  
24  
25  
26  
27  
28  
29  
30  
31  
32  
33  
34  
35  
36  
37  
38  
39  
40  
41  
42  
43  
44  
45  
46  
47  
48  
49  
50  
51  
52  
53  
54  
55  
56  
57  
58  
59  
60

It is important to emphasise that other factors that influence poor BP control are the presence  
of comorbidities and treatment with two or more antihypertensive drugs. Following the  
recommendations in the clinical guidelines, it is sometimes necessary to increase the number  
of drugs to improve BP control.<sup>14;16;33;34</sup> Moreover, unknown or unmeasured confounding  
factors not analysed in this study, such as patient's treatment compliance, could explain the  
fact that this association has not been found in our study.

### **Strengths and weaknesses of the study**

The population-based design and mixed-effects modelling on repeated measures were the  
main strengths of this study. The extensive catchment population included in the investigation  
reinforces the external validity of these findings. Most studies on similar QI strategies have  
been carried out in samples of hypertensive patients.<sup>27-29;35</sup>

The mixed models approach is a powerful method for analysing data from longitudinal  
studies which include multiple measurements on each participant.<sup>24;36</sup> This approach allows  
the use of all available data and explicit modelling of the within- and between-person  
variation in the outcome, while taking into account the correlation between measurements  
obtained from the same individual, which other classical models of analysis cannot explore.

1 We would like to emphasise that most of the intervention in this study has been implemented  
2 with few additional resources, since the QI plan was carried out with the usual human and  
3 financial resources allocated to the health area of the intervention group. Only the publication  
4 of the training material in the form of posters and leaflets and the replacement of  
5 sphygmomanometers involved additional costs. Sometimes, the main difficulty lies in the  
6 feasibility of including in the PHCT routine and at low cost simultaneous strategies that  
7 impact on every hypertensive patient.  
8

9  
10  
11  
12  
13  
14  
15  
16  
17 The duration of the study can be considered the main limitation of this investigation. We have  
18 not been able to determine if the improvements are sustainable after the intervention was  
19 finalised, though a study carried out in Spain suggested that the effect of quality interventions  
20 on hypertension tend to decrease over time.<sup>30</sup> Also, we do not know if a better hypertension  
21 control in the intervention group is related to a decrease in cardiovascular morbi-mortality.  
22  
23

24  
25  
26  
27  
28 The impossibility of randomising by PHCT is another limitation of the study, partially  
29 compensated by selecting two different administrative health areas for each group to prevent  
30 contamination issues amongst PHCT professionals of the same area.  
31  
32

33  
34  
35 The BP measurements used in the study were obtained as part of the routine care and were  
36 therefore subjected to error and variability amongst professionals, as reflected in the  
37 computerised clinical record. To minimise variability, training workshops took place during  
38 the one year follow-up on BP measurement methods and data entry in the patient's clinical  
39 record.  
40  
41  
42  
43  
44

#### 45 **Policy implications, future research and conclusions**

46  
47  
48 The results of this study show that in our setting it is feasible to implement a QI plan for the  
49 improvement of hypertension control in the PHCTs. The design of this QI plan to integrate it  
50 in the regular clinical care of the PHCT professionals (doctors, nurses and administrative  
51 staff) without a significant increase in workload or cost is its main advantage. Longer-term  
52 studies that include unmeasured factors are needed to determine the effectiveness and cost-  
53  
54  
55  
56  
57  
58  
59  
60

1  
2  
3  
4  
5  
6  
7  
8  
9  
10  
11  
12  
13  
14  
15  
16  
17  
18  
19  
20  
21  
22  
23  
24  
25  
26  
27  
28  
29  
30  
31  
32  
33  
34  
35  
36  
37  
38  
39  
40  
41  
42  
43  
44  
45  
46  
47  
48  
49  
50  
51  
52  
53  
54  
55  
56  
57  
58  
59  
60

effectiveness of this measure and the impact of a reduction in BP values on cardiovascular morbi-mortality in the hypertensive population.

For peer review only

1  
2  
3  
4  
5  
6  
7  
8  
9  
10  
11  
12  
13  
14  
15  
16  
17  
18  
19  
20  
21  
22  
23  
24  
25  
26  
27  
28  
29  
30  
31  
32  
33  
34  
35  
36  
37  
38  
39  
40  
41  
42  
43  
44  
45  
46  
47  
48  
49  
50  
51  
52  
53  
54  
55  
56  
57  
58  
59  
60

**Acknowledgements:** This study has been possible thanks to the generous collaboration of doctors and nurses from the Cerdanyola-Ripollet Primary Care Area (ICS), which constitutes the INCOTECA Research Group. We are also indebted to the computing and infrastructure staff at the Àmbit Centre of the Catalan Health Institute and to Javier Sevilla in particular. Thanks for Eulàlia Farré to translate the paper.

**Competing interests:** None declared.

**Funding statement:** In 2006 the project received the Research Prize in Primary Health Care of the Catalan Health Service Barcelona Region. In 2006 the project obtained an award to the Best Initiatives in Pharmaceutical Attention, published in the *Correo Farmacéutico*. Esteve Laboratories funded the production of posters and leaflets with the decision-making algorithms. IDIAP Jordi Gol funded the translation of the paper from Spanish into English.

**Contributors:** RVF contributed to conception and design of study and analysis and interpretation of data, and drafting and revising of the article, and gave final approval. TRB and MRM contributed to analysis and interpretation of data and drafting and revising of article and gave final approval. MRM, LMM, GMDL and AFS contributed to conception and design of study. LMM, FMF, SMM, EBS, AAL, JCMV, MSAO and IOM contributed to acquisition of data. JMBS contributed to drafting and revising of the article.

**Other contributor who do not qualify as authors:**

**The INCOTECA Research Group:**, Núria Aznar (EAP Barberà, ICS); Ana M<sup>a</sup> Cascos, (EAP Serraparera, ICS); Olga Correcher (SAP Cerdanyola-Ripollet, ICS); Guadalupe Figueiras, (SAP Cerdanyola-Ripollet, ICS); Consol Heras, (DAP Metropolitana Nord, ICS); Òscar Hernández, (SAP Sabadell-Rubí-St.Cugat-Terrassa); Sebastià Juncosa, (DAP Metropolitana Nord, ICS); Fernando Marín, (Centre Corporatiu, ICS); Carmen Martínez,

1 (DAP Metropolitana Nord, ICS); Jordi Puig (SAP Bages-Berguedà); Carolina Rovira, (SAP  
2 Bages-Berguedà); Javier Sevilla (DAP Metropolitana Nord, ICS); Joaquim Verdager, (DAP  
3  
4  
5  
6  
7  
8  
9  
10  
11  
12  
13  
14  
15  
16  
17  
18  
19  
20  
21  
22  
23  
24  
25  
26  
27  
28  
29  
30  
31  
32  
33  
34  
35  
36  
37  
38  
39  
40  
41  
42  
43  
44  
45  
46  
47  
48  
49  
50  
51  
52  
53  
54  
55  
56  
57  
58  
59  
60

Metropolitana Nord, ICS).

**Ethical approval:** The study protocol has received institutional review board approval  
(IDIAP Jordi Gol Ethical Clinical Committee).

**Data sharing statement:** No additional data available



## REFERENCES

## Reference List

- (1) Lopez AD, Mathers CD, Ezzati M, *et al.*. Global and regional burden of disease and risk factors, 2001: systematic analysis of population health data. *Lancet* 2006;367:1747-1757.
- (2) Kearney PM, Whelton M, Reynolds K, *et al.* Global burden of hypertension: analysis of worldwide data. *Lancet* 2005;365:217-223.
- (3) Rodriguez Roca GC, Artigao Rodenas LM, Llisterri Caro JL, *et al.* [Control of hypertension in elderly patients receiving primary care in Spain]. *Rev Esp Cardiol* 2005;58:359-366.
- (4) Graciani A, Zuluaga-Zuluaga MC, Banegas JR, *et al.* [Cardiovascular mortality attributable to high blood pressure in Spanish population over 50]. *Med Clin (Barc )* 2008;131:125-129.
- (5) Glynn LG, Murphy AW, Smith SM, *et al.* Interventions used to improve control of blood pressure in patients with hypertension. *Cochrane Database Syst Rev* 2010; 3:CD005182.
- (6) Kaplan NM, Opie LH. Controversies in hypertension. *Lancet* 2006;367:168-176.
- (7) Llisterri Caro JL, Rodriguez Roca GC, Alonso Moreno FJ, *et al.* [Control of blood pressure in Spanish hypertensive population attended in primary health-care. PRESCAP 2006 Study]. *Med Clin (Barc )* 2008;130:681-687.
- (8) Departament de Sanitat i Seguretat Social. Pla de salut de Catalunya a l'horitzó 2010. Informe de Salut a Catalunya [ 2010 Available from: URL:<http://www20.gencat.cat/portal/site/pla-salut/menuitem.7baf2c730ce9e94d061ead10b0c0e1a0/?vgnextoid=f2a810b73ed17110VgnVCM100000b0c1e0aRCRD&vgnnextchannel=f2a810b73ed17110VgnVCM100000b0c1e0aRCRD&vgnnextfmt=default>
- (9) Rodriguez-Roca GC, Pallares-Carratala V, Alonso-Moreno FJ, *et al.* Blood pressure control and physicians' therapeutic behavior in a very elderly Spanish hypertensive population. *Hypertens Res* 2009;32:753-758.
- (10) Carter BL, Rogers M, Daly J, *et al.* The potency of team-based care interventions for hypertension: a meta-analysis. *Arch Intern Med* 2009;169:1748-1755.
- (11) Fahey T, Schroeder K, Ebrahim S. Educational and organisational interventions used to improve the management of hypertension in primary care: a systematic review. *Br J Gen Pract* 2005;55:875-882.
- (12) Walsh JM, McDonald KM, Shojania KG, *et al.* Quality improvement strategies for hypertension management: a systematic review. *Med Care* 2006;44:646-657.

- 1 (13) Valles-Fernandez R, Rosell-Murphy M, Correcher-Aventin O, *et al.* A quality  
2 improvement plan for hypertension control: the INCOTECA Project (INterventions  
3 for COntrol of hyperTension in Catalonia). *BMC Public Health* 2009;9:89.
- 4 (14) 2003 European Society of Hypertension-European Society of Cardiology guidelines  
5 for the management of arterial hypertension. *J Hypertens* 2003;21:1011-1053.
- 6 (15) Topouchian JA, El Assaad MA, Orobinskaia LV, *et al.* Validation of two automatic  
7 devices for self-measurement of blood pressure according to the International Protocol  
8 of the European Society of Hypertension: the Omron M6 (HEM-7001-E) and the  
9 Omron R7 (HEM 637-IT). *Blood Press Monit* 2006;11:165-171.
- 10 (16) Amado E, Brotons C, Dalfó A, *et al.* Guia de Práctica Clínica Hipertensió Arterial.  
11 Guies de Pràctica Clínica i Material Docent [ 2003 6 Available from:  
12 URL:<http://www.gencat.net/ics/professionals/guies/hipertensio/hipertensio.htm>  
13
- 14 (17) Des J, Lyles C, Crepaz N. Improving the reporting quality of nonrandomized  
15 evaluations of behavioral and public health interventions: the TREND statement. *Am J*  
16 *Public Health* 2004;94:361-366.
- 17 (18) Ukoumunne OC, Gulliford MC, Chinn S, *et al.* Methods for evaluating area-wide and  
18 organisation-based interventions in health and health care: a systematic review. *Health*  
19 *Technol Assess* 1999;3:iii-92.
- 20 (19) Cohen J. *Statistical Power Analysis for the Behavioral Sciences*. 2nd ed. Associates,  
21 New Jersey: LE Associates; 1988.
- 22 (20) Kazis LE, Anderson JJ, Meenan RF. Effect sizes for interpreting changes in health  
23 status. *Med Care* 1989;27(3 Suppl):S178-S189.
- 24 (21) Terwee CB, Dekker FW, Wiersinga WM, *et al.* On assessing responsiveness of health-  
25 related quality of life instruments: guidelines for instrument evaluation. *Qual Life Res*  
26 2003;12:349-362.
- 27 (22) Brazier JE, Roberts J. The estimation of a preference-based measure of health from the  
28 SF-12. *Med Care* 2004;42:851-859.
- 29 (23) Burton P, Gurrin L, Sly P. Extending the simple linear regression model to account for  
30 correlated responses: an introduction to generalized estimating equations and multi-  
31 level mixed modelling. *Stat Med* 1998;17:1261-1291.
- 32 (24) Singer J, Willett J. *Applied longitudinal data analysis: modelling change and event*  
33 *occurrence*. New York: Oxford University Press; 2003.
- 34 (25) Allaire BT, Trogon JG, Egan BM, *et al.* Measuring the impact of a continuing  
35 medical education program on patient blood pressure. *J Clin Hypertens (Greenwich)*  
36 2011;13:517-522.
- 37 (26) Trogon JG, Allaire BT, Egan BM, *et al.* Training providers in hypertension  
38 guidelines: Cost-effectiveness evaluation of a continuing medical education program  
39 in South Carolina. *Am Heart J* 2011;162:786-793.
- 40 (27) Landon BE, Hicks LS, O'Malley AJ, *et al.* Improving the management of chronic  
41 disease at community health centers. *N Engl J Med* 2007;356:921-934.
- 42
- 43
- 44
- 45
- 46
- 47
- 48
- 49
- 50
- 51
- 52
- 53
- 54
- 55
- 56
- 57
- 58
- 59
- 60

- 1  
2  
3  
4  
5  
6  
7  
8  
9  
10  
11  
12  
13  
14  
15  
16  
17  
18  
19  
20  
21  
22  
23  
24  
25  
26  
27  
28  
29  
30  
31  
32  
33  
34  
35  
36  
37  
38  
39  
40  
41  
42  
43  
44  
45  
46  
47  
48  
49  
50  
51  
52  
53  
54  
55  
56  
57  
58  
59  
60
- (28) Jafar TH, Hatcher J, Poulter N, *et al.* Community-based interventions to promote blood pressure control in a developing country: a cluster randomized trial. *Ann Intern Med* 2009;151:593-601.
- (29) Svetkey LP, Pollak KI, Yancy WS, *et al.* Hypertension improvement project: randomized trial of quality improvement for physicians and lifestyle modification for patients. *Hypertension* 2009;54:1226-1233.
- (30) Gomez Marcos MA, Rodriguez SE, Ramos DE, *et al.* [Durability of the effects of a quality improvement intervention in hypertensive patients on long-term follow-up (CICLO-RISK study)]. *Aten Primaria* 2009;41:371-378.
- (31) Cook NR, Cohen J, Hebert PR, *et al.* Implications of small reductions in diastolic blood pressure for primary prevention. *Arch Intern Med* 1995;155:701-709.
- (32) Lewington S, Clarke R, Qizilbash N, *et al.* Age-specific relevance of usual blood pressure to vascular mortality: a meta-analysis of individual data for one million adults in 61 prospective studies. *Lancet* 2002;360:1903-1913.
- (33) Boger-Megiddo I, Heckbert SR, Weiss NS, *et al.* Myocardial infarction and stroke associated with diuretic based two drug antihypertensive regimens: population based case-control study. *BMJ* 2010;340:c103.
- (34) Mancia G, De BG, Dominiczak A, *et al.* 2007 ESH-ESC Practice Guidelines for the Management of Arterial Hypertension: ESH-ESC Task Force on the Management of Arterial Hypertension. *J Hypertens* 2007;25:1751-1762.
- (35) Gomez Marcos MA, Garcia OL, Gonzalez Elena LJ, *et al.* [Effectiveness of an intervention to improve quality care in reducing cardiovascular risk in hypertense patients]. *Aten Primaria* 2006;37:498-503.
- (36) Goldstein H, Browne W, Rasbash J. Multilevel modelling of medical data. *Stat Med* 2002;21:3291-3315.

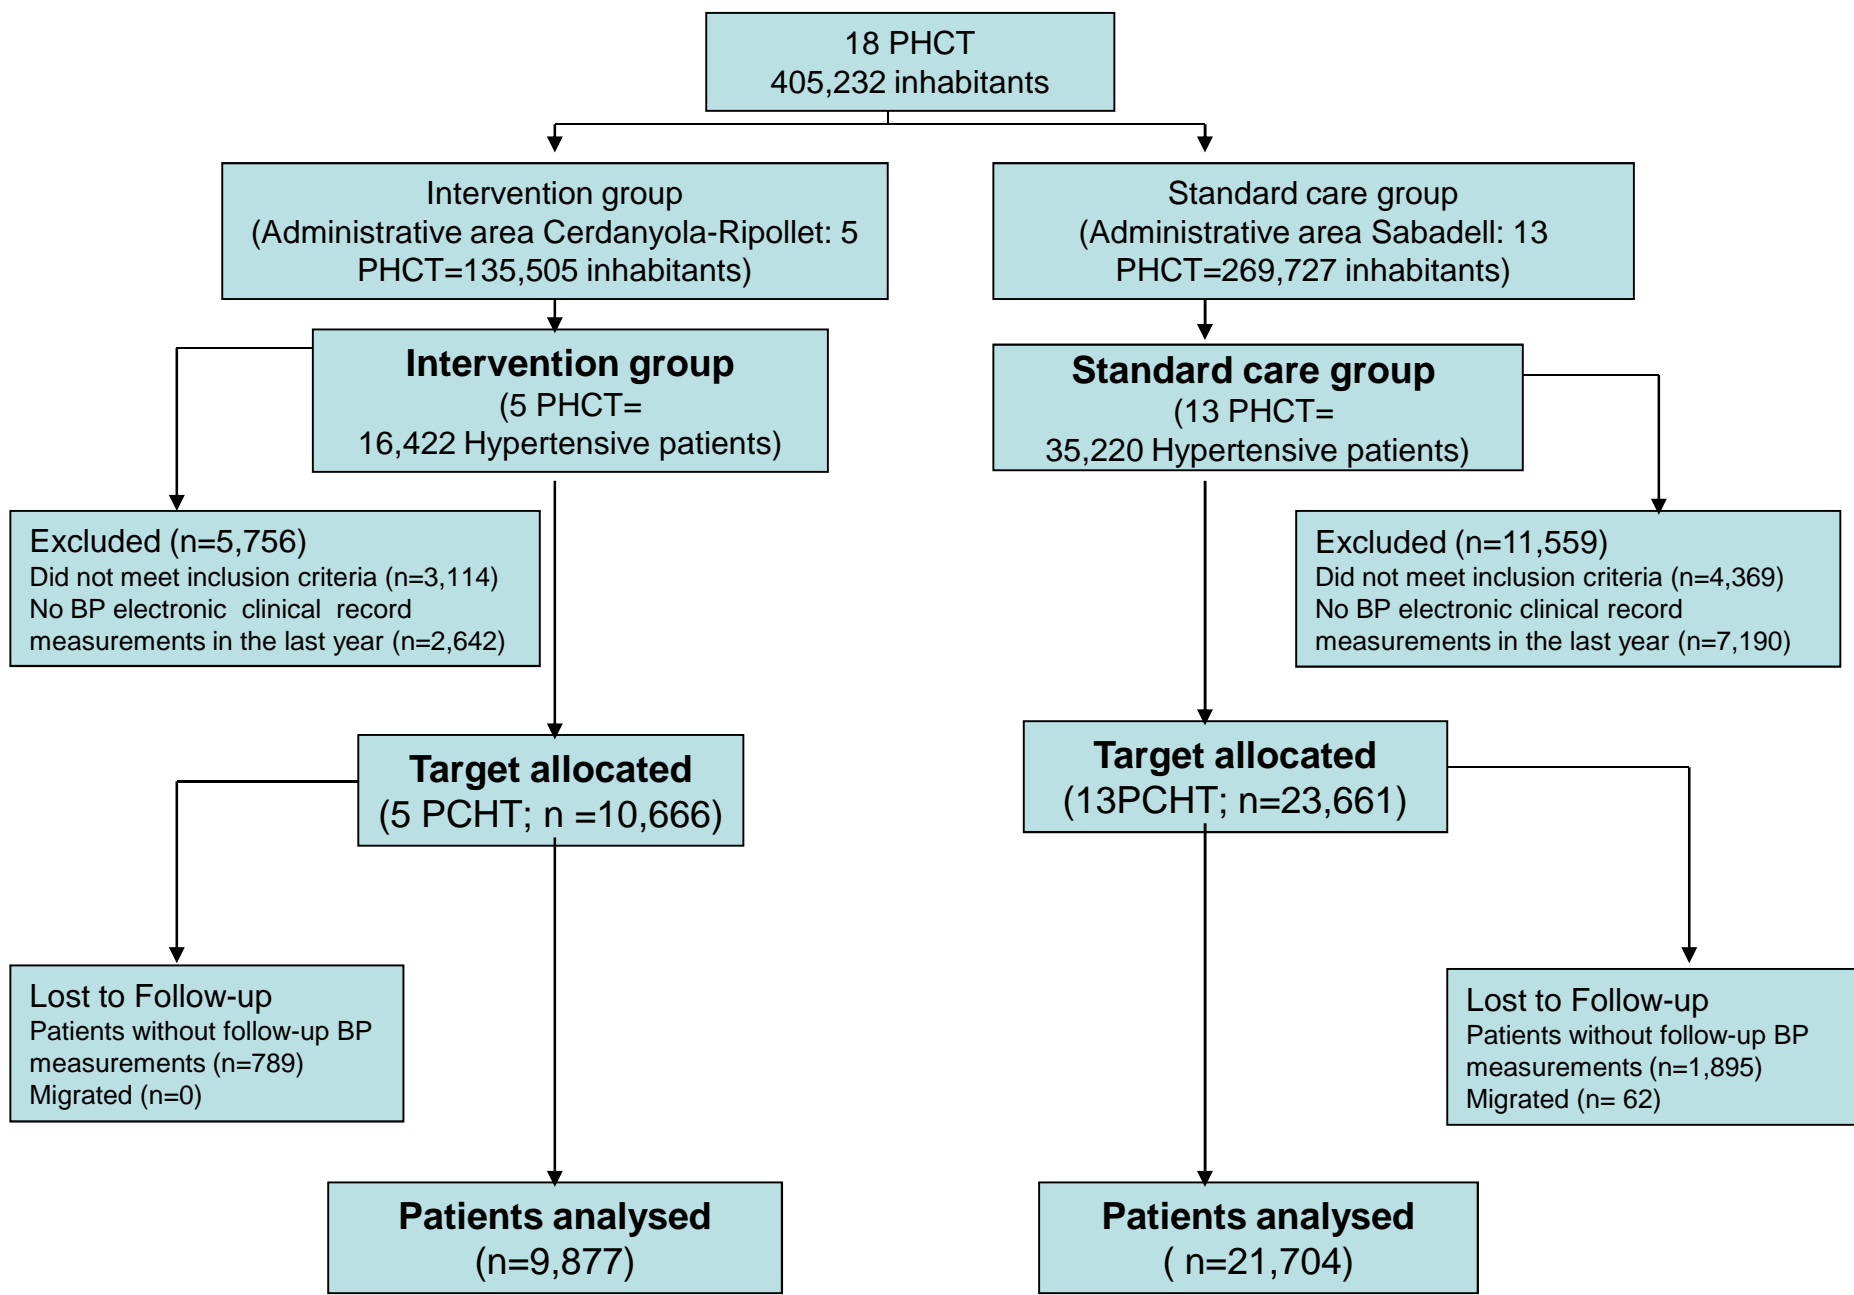

Fig 1 Flow chart of study. PHCT= Primary Health Care Teams; BP= blood pressure

1  
2  
3  
4  
5  
6  
7  
8  
9  
10  
11  
12  
13  
14  
15  
16  
17  
18  
19  
20  
21  
22  
23  
24  
25  
26  
27  
28  
29  
30  
31  
32  
33  
34  
35  
36  
37  
38  
39  
40  
41  
42  
43  
44  
45  
46  
47

**STROBE 2007 (v4) checklist of items to be included in reports of observational studies in epidemiology\***  
**Checklist for cohort, case-control, and cross-sectional studies (combined)**

| Section/Topic             | Item # | Recommendation                                                                                                                                                                                                                                                                                                                                                                                                                                                         | Reported on page # |
|---------------------------|--------|------------------------------------------------------------------------------------------------------------------------------------------------------------------------------------------------------------------------------------------------------------------------------------------------------------------------------------------------------------------------------------------------------------------------------------------------------------------------|--------------------|
| Title and abstract        | 1      | (a) Indicate the study's design with a commonly used term in the title or the abstract                                                                                                                                                                                                                                                                                                                                                                                 | 1                  |
|                           |        | (b) Provide in the abstract an informative and balanced summary of what was done and what was found                                                                                                                                                                                                                                                                                                                                                                    | 4,5                |
| <b>Introduction</b>       |        |                                                                                                                                                                                                                                                                                                                                                                                                                                                                        |                    |
| Background/rationale      | 2      | Explain the scientific background and rationale for the investigation being reported                                                                                                                                                                                                                                                                                                                                                                                   | 7-8                |
| Objectives                | 3      | State specific objectives, including any pre-specified hypotheses                                                                                                                                                                                                                                                                                                                                                                                                      | 8                  |
| <b>Methods</b>            |        |                                                                                                                                                                                                                                                                                                                                                                                                                                                                        |                    |
| Study design              | 4      | Present key elements of study design early in the paper                                                                                                                                                                                                                                                                                                                                                                                                                | 8-12               |
| Setting                   | 5      | Describe the setting, locations, and relevant dates, including periods of recruitment, exposure, follow-up, and data collection                                                                                                                                                                                                                                                                                                                                        | 8-9                |
| Participants              | 6      | (a) <i>Cohort study</i> —Give the eligibility criteria, and the sources and methods of selection of participants. Describe methods of follow-up<br><i>Case-control study</i> —Give the eligibility criteria, and the sources and methods of case ascertainment and control selection. Give the rationale for the choice of cases and controls<br><i>Cross-sectional study</i> —Give the eligibility criteria, and the sources and methods of selection of participants | 8-9                |
|                           |        | (b) <i>Cohort study</i> —For matched studies, give matching criteria and number of exposed and unexposed<br><i>Case-control study</i> —For matched studies, give matching criteria and the number of controls per case                                                                                                                                                                                                                                                 |                    |
| Variables                 | 7      | Clearly define all outcomes, exposures, predictors, potential confounders, and effect modifiers. Give diagnostic criteria, if applicable                                                                                                                                                                                                                                                                                                                               | 11                 |
| Data sources/ measurement | 8*     | For each variable of interest, give sources of data and details of methods of assessment (measurement). Describe comparability of assessment methods if there is more than one group                                                                                                                                                                                                                                                                                   | 10                 |
| Bias                      | 9      | Describe any efforts to address potential sources of bias                                                                                                                                                                                                                                                                                                                                                                                                              | 9                  |
| Study size                | 10     | Explain how the study size was arrived at                                                                                                                                                                                                                                                                                                                                                                                                                              | 8                  |
| Quantitative variables    | 11     | Explain how quantitative variables were handled in the analyses. If applicable, describe which groupings were chosen and why                                                                                                                                                                                                                                                                                                                                           | 11                 |
| Statistical methods       | 12     | (a) Describe all statistical methods, including those used to control for confounding                                                                                                                                                                                                                                                                                                                                                                                  | 11,12              |
|                           |        | (b) Describe any methods used to examine subgroups and interactions                                                                                                                                                                                                                                                                                                                                                                                                    | 11,12              |
|                           |        | (c) Explain how missing data were addressed                                                                                                                                                                                                                                                                                                                                                                                                                            | 11                 |
|                           |        | (d) <i>Cohort study</i> —If applicable, explain how loss to follow-up was addressed<br><i>Case-control study</i> —If applicable, explain how matching of cases and controls was addressed                                                                                                                                                                                                                                                                              |                    |

|                          |     |                                                                                                                                                                                                              |                       |
|--------------------------|-----|--------------------------------------------------------------------------------------------------------------------------------------------------------------------------------------------------------------|-----------------------|
|                          |     | <i>Cross-sectional study</i> —If applicable, describe analytical methods taking account of sampling strategy                                                                                                 |                       |
|                          |     | (e) Describe any sensitivity analyses                                                                                                                                                                        | 11,12                 |
| <b>Results</b>           |     |                                                                                                                                                                                                              |                       |
| Participants             | 13* | (a) Report numbers of individuals at each stage of study—eg numbers potentially eligible, examined for eligibility, confirmed eligible, included in the study, completing follow-up, and analysed            | 12,13                 |
|                          |     | (b) Give reasons for non-participation at each stage                                                                                                                                                         | 12                    |
|                          |     | (c) Consider use of a flow diagram                                                                                                                                                                           | 12 (figure 1)         |
| Descriptive data         | 14* | (a) Give characteristics of study participants (eg demographic, clinical, social) and information on exposures and potential confounders                                                                     | 13 (table 1)          |
|                          |     | (b) Indicate number of participants with missing data for each variable of interest                                                                                                                          |                       |
|                          |     | (c) <i>Cohort study</i> —Summarise follow-up time (eg, average and total amount)                                                                                                                             |                       |
| Outcome data             | 15* | <i>Cohort study</i> —Report numbers of outcome events or summary measures over time                                                                                                                          |                       |
|                          |     | <i>Case-control study</i> —Report numbers in each exposure category, or summary measures of exposure                                                                                                         |                       |
|                          |     | <i>Cross-sectional study</i> —Report numbers of outcome events or summary measures                                                                                                                           | 13 (table 1)          |
| Main results             | 16  | (a) Give unadjusted estimates and, if applicable, confounder-adjusted estimates and their precision (eg, 95% confidence interval). Make clear which confounders were adjusted for and why they were included | 14,15,16              |
|                          |     | (b) Report category boundaries when continuous variables were categorized                                                                                                                                    | 13 (table 1)          |
|                          |     | (c) If relevant, consider translating estimates of relative risk into absolute risk for a meaningful time period                                                                                             | 14,16 (table 2 and 3) |
| Other analyses           | 17  | Report other analyses done—eg analyses of subgroups and interactions, and sensitivity analyses                                                                                                               | 15,16 (table 3)       |
| <b>Discussion</b>        |     |                                                                                                                                                                                                              |                       |
| Key results              | 18  | Summarise key results with reference to study objectives                                                                                                                                                     | 17                    |
| Limitations              | 19  | Discuss limitations of the study, taking into account sources of potential bias or imprecision. Discuss both direction and magnitude of any potential bias                                                   | 19,20                 |
| Interpretation           | 20  | Give a cautious overall interpretation of results considering objectives, limitations, multiplicity of analyses, results from similar studies, and other relevant evidence                                   | 17-20                 |
| Generalisability         | 21  | Discuss the generalisability (external validity) of the study results                                                                                                                                        | 20,21                 |
| <b>Other information</b> |     |                                                                                                                                                                                                              |                       |
| Funding                  | 22  | Give the source of funding and the role of the funders for the present study and, if applicable, for the original study on which the present article is based                                                | 22                    |

\*Give information separately for cases and controls in case-control studies and, if applicable, for exposed and unexposed groups in cohort and cross-sectional studies.

**Note:** An Explanation and Elaboration article discusses each checklist item and gives methodological background and published examples of transparent reporting. The STROBE checklist is best used in conjunction with this article (freely available on the Web sites of PLoS Medicine at <http://www.plosmedicine.org/>, Annals of Internal Medicine at <http://www.annals.org/>, and Epidemiology at <http://www.epidem.com/>). Information on the STROBE Initiative is available at [www.strobe-statement.org](http://www.strobe-statement.org).
